# Supplementary material for: Gene Cloning, Tissue Expression Profiles and Antiviral Activities of Interferon-β from Two Chinese Miniature Pig Breeds
Source: MDPI journal article supplement (doi:10.3390/vetsci9040190), 2022-04-15
Supplement: s1 [file s1]

**Supplementary Table S1.** GenBank accession numbers of different animal species used for sequence alignment.

| Species                | GenBank Accession no |
|------------------------|----------------------|
| Bama miniature pig     | OL446997             |
| Banna miniature pig    | OL446998             |
| Sus scrofa             | AEQ59453             |
| Bos Taurus             | XP_002689587         |
| Ovis aries             | XP_004004449         |
| Capra hircus           | AFU82528             |
| Equus caballus         | NP_001092910         |
| Felis catus            | NP_001009297         |
| Canis lupus familiaris | NP_001129259         |
| Camelus bactrianus     | XP_010944318         |
| Homo sapiens           | NP_002167            |
