# Supplementary material for: Gene Cloning, Tissue Expression Profiles and Antiviral Activities of Interferon-β from Two Chinese Miniature Pig Breeds
Source: MDPI journal article supplement (doi:10.3390/vetsci9040190), 2022-04-15
Supplement: s1 [file s1]

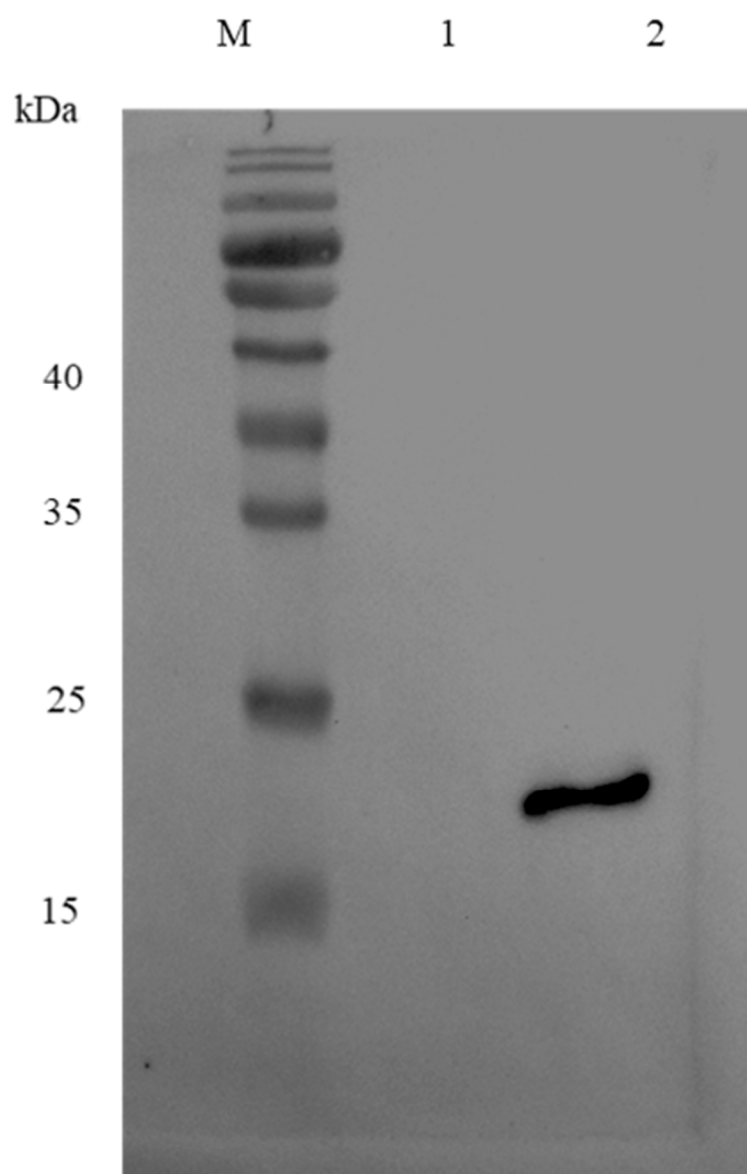

Supplementary Figure S1. Western blotting, Identification of rPoIFN- $\beta$  from Bama miniature pig: (1) Induced pet30a; (2) purified rPoIFN- $\beta$
